# Supplementary material
Source: PubMed Central journal article supplement (PMC1143076)
Supplement: plntcell_tpc.105.031641_1.pdf [file plntcell_tpc.105.031641_1.pdf]

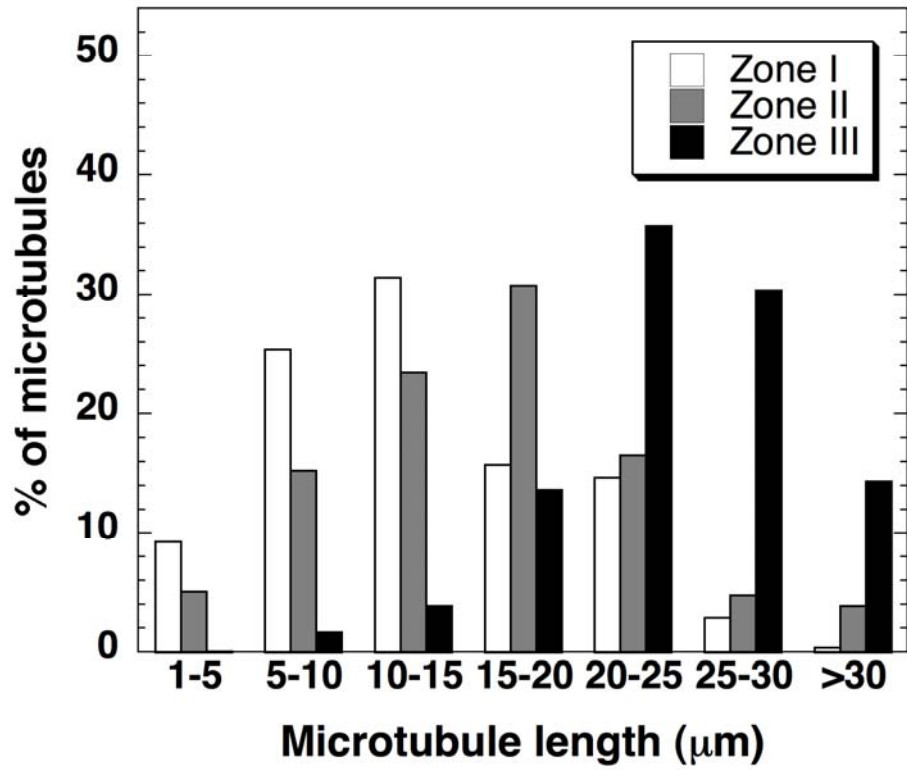

Figure 1

Average length of bundled and overlapped microtubules in *Lotus japonicus* root hairs at different stages of their development (n = 180 microtubules from 45 root hairs).
